# Supplementary material
Source: publisher site journal article supplement (https://www.dovepress.com/article/590477)
Supplement: Supplementary file 1 [file 590477_Supplemental%20Material.docx]

**Supplemental Material**

**Supplement A**

**Supplemental Table 1a.** Maternal characteristics relative to caregiving activities

| **Maternal data** | | | | | | | | | |
| --- | --- | --- | --- | --- | --- | --- | --- | --- | --- |
|  | | **FP** | | | | **FC** | | | |
|  | | **Low** | **Moderate** | **High** | *p* | **Low** | **Moderate** | **High** | ***p*** |
| **Mode delivery** | Vaginal | 12 (42.9%) | 10 (52.6%) | 1 (25%) | .734 | 7 (41.2%) | 11(44.0%) | 5 (55.6%) | .74 |
| C-section (stat) | 14 (50.0%) | 8 (42.1%) | 2 (50.0%) | 9 (52.9%) | 12 (48.0%) | 3 (33.3%) |
| Unknown | 2 (7.1%) | 1 (5.3%) | 1 (25.0%) | 1 (5.9%) | 2 (6.0%) | 1 (11.1%) |
| **Race** | White | 5 (17.9%) | 6 (31.6%) | 2 (50.0%) | .035* | 3 (17.6%) | 7 (28.0%) | 3 (33.3%) | .033* |
| Asian | 1 (3.6%) | 3 (15.8%) | 0 (.0%) | 0 (.0%) | 2 (8.00%) | 2 (22.2%) |
| Black or African American | 8 (28.9%) | 2 (10.5%) | 0 (.0%) | 8 (29.40%) | 4 (16.0%) | 1 (11.1%) |
| Other | 1 (3.60%) | 2 (5.30%) | 10 (25.0%) | 0 (.0%) | 2 (8.0%) | 1 (11,1%) |
| Multiple | 10 (35.7%) | 6 (31.6%) | 1 (21%) | 9 (53%) | 10 (40%) | 2 (22.2%) |
| Not reported | 1 (3.6%) | 2 (5.30%) | 0 (.0%) | 9 (53%) | 10 (40%) | 2 (22.2%) |
| **Ethnicity** | Non-Hispanic or Latino | 18 (64.3%) | 13 (68.4%) | 2 (50.0%) | .153 | 12 (70.6%) | 14 (56.0%) | 7 (77.8%) | .565 |
| Hispanic or Latino | 4 (14.3%) | 1 (5.3%) | 2 (50.0%) | 1 (5.9%) | 4 (16.0%) | 2 (22.2%) |
| Not Reported | 6 (21.4%) | 5 (26.3%) | 0 (.0%) | 4 (23.5%) | 7 (28%) | 0 (.0%) |
| **Maternal education** | < Seventh grade | 1 (3.6%) | 0 (.0%) | 0 (.0%) | .006** | 0 (0.0%) | 1 (4.0%) | 0 (.0%) | .001** |
| Junior – partial high school (9th grade) | 1 (3.6%) | 0 (.0%) | 0 (.0%) | 1 (5.9%) | 0 (.0%) | 0 (.0%) |
| High school graduate | 11 (39.3%) | 1 (5.3%) | 0 (.0%) | 8 (47.0%) | 4 (16.0%) | 0 (.0%) |
| Partial college or specialized training | 7 (25%) | 5 (26.3%) | 0 (.0%) | 5 (29.4% (5) | 5 (20.0%) | 2 (22.2%) |
| Standard college or university graduation | 3 (10.7%) | 5 (26.3%) | 4 (100%) | 1 (5.9%) | 5 (20.0%) | 6 (66.7%) |
| Graduate or professional training | 3 (10.7%) | 6 (31.6%) | 0 (.0%) | 0 (.0%) | 8 (32.0%) | 1 (11.1%) |
| Unknown | 2 (7.2%) | 2 (10.5%) | 0 (.0%) | 2 (11.8%) | 2(8.0%) | 0 (.0%) |
| **Other maternal data** | Maternal age | 28.7 (6.09) | 29.6 (4.9) | 31.5 (23.8) | .601 | 27.6 (5.55) | 29.2 (5.8) | 32.2 (2.73) | .12 |
| GA at Delivery | 29.9 (6.43) | 30.9 (8.42) | 31.4 (0) | .857 | 29 (4.07) | 32.3 (8.64) | 30.9 (.5) | .424 |
| Gravida | 3.0 (2.75) | 1.0 (1.75) | 1.5 (1.25) | .076^ | 3.0 (2.0) | 1.0 (2.25) | 2.0 (2.0) | .362 |

**Notes:** Measures are presented as *n (%)*. *p-*values were calculated using the Kruskal–Wallis test for non-normally distributed continuous variables and Fisher’s exact test for categorical variables. Significance levels: ^p < .10; *p < .05; **p < .01.

**Abbreviations:** FP, Functional Parenting; PC, Physical Contact; GA, Gestational Age; *p*, p-value.

**Supplemental Table 1b.** Infant characteristics relative to caregiving activities

|  | | **FP** | | | | **FC** | | | |
| --- | --- | --- | --- | --- | --- | --- | --- | --- | --- |
| **Low** | **Moderate** | **High** | *p* | **Low** | **Moderate** | **High** | ***p*** |
| **Infant data** | | | | | | | | | |
| Sex | Male | 14 (50.0%) | 10 (52.6%) | 3 (75%) | .757 | 9 (52.9%) | 13 (52.0%) | 5 (55.6%) | 1 |
| Female | 14 (50.0 %) | 9 (47.4) | 1 (25%) |  | 8 (47.1 %) | 12 (48.0%) | 4 (44.4%) |
| **Ethnicity** | Non-Hispanic or Latino | 21 (75.0%) | 14 (73.7%) | 2 (50.0%) | .117 | 13 (76.5%) | 18 (72.0%) | 6 (66.7%) | .448 |
| Hispanic or Latino | 5 (17.9%) | 1 (5.3%) | 2 (50.0%) | 2 (11.8%) | 4 (16.0%) | 2 (22.2%) |
| Unknown | Unknown | 2 (7.1%) | 4 (16.1%) | 1 (11.1%) | 3 (12%) | 1 (11.1%) |
| **Hospitalization** | Lengths of Stay | 57.5 (53.2%) | 68 (63%) | 10 (8.75%) | .039* | 56 (52%) | 72 (47%) | 18 (34%) | .021* |

**Notes:** Measures are presented as *n (%)*. *p-*values were calculated using the Kruskal–Wallis test for non-normally distributed continuous variables and Fisher’s exact test for categorical variables. Significance levels: *p < .05.

**Abbreviations:** FP, Functional Parenting; PC, Physical Contact; *p*, p-value.

**Supplemental Table 2**. Patient’s mental health characteristics

|  | | **FP** | | | | **PC** | | | |
| --- | --- | --- | --- | --- | --- | --- | --- | --- | --- |
| **Low** | **Moderate** | **High** | ***p*** | **Low** | **Moderate** | **High** | ***p*** |
| **Stress Measures** | PSS | 20.0 (5.86) | 10.0 (9.39) | 18.5 (9.75) | .933 | 21.1 (8.57) | 19.2 (8.05) | 21.1 (8.57) | .808 |
| STAI State | 44.5 (13.6) | 47.2 (12.1) | 35 (14.3) | .254 | 40.9 (13.9) | 47.7 (13.5) | 40.9 (13.9) | .320 |
| STAI Trait | 42.8 (9.70) | 42.3 (11.9) | 34.2 (12.7) | .339 | 38 (12.9) | 43.6 (10.8) | 38 (12.9) | .431 |
| PSS:NICU A | 6.94 (3.07) | 6.3 (3.3) | 4 (NA) | .627 | 6.45 (3.17) | 7.0 (3.17) | 4.0 (0.0) | .430 |
| PSS:NICU B | 28 (7.75) | 22 (14.5) | 15 (0) | .227 | 28 (10.5) | 27 (15.2) | 17.5 (2.5) | .468 |

**Notes:** Continuous measures are presented as *Mean (SD)* when normally distributed and *Median (IQR)* when non-normally distributed. *p-*values were calculated using the Kruskal–Wallis test for non-normally distributed continuous variables and Fisher’s exact test for categorical variables. **Abbreviations:** FP, Functional Parenting; PC, Physical Contact; PSS, Perceived Stress Scale; PSS: NICU, Perceived Stress Scale: Neonatal Intensive Care Unit; PSS: NICU A, Perceived Stress Scale: Neonatal Intensive Care Unit Sub-scale A (Medical vulnerability), PSS: NICU B, Perceived Stress Scale: Neonatal Intensive Care Unit sub-scale B (Perceived lack of control), STAI-Trait, State-Trait Anxiety Inventory–Trait; STAI-State, State-Trait Anxiety Inventory–State; *p*, p-value.

**Supplemental Table 3.** *Unadjusted Models*

| **Outcome** | **Factors** | **Estimate** | **Std E.** | **T-value** | ***p*** | **Adj. R2** |
| --- | --- | --- | --- | --- | --- | --- |
| **FP** | PSS | 2.95x10-4 | .006 | .052 | .959 | -.02 |
| STAI State | -4.22 x10-4 | .003 | -.127 | .900 | -.021 |
| STAI Trait | -.003 | .004 | -.854 | .397 | -.006 |
| PSS: NICU A | - .007 | .017 | -.391 | .699 | -.034 |
| PSS: NICU B | - .009 | .005 | -1.698 | .102 | -.068 |
| **PC** | PSS | -3.46x10-4 | .006 | -.06 | .952 | -.020 |
| STAI State | -.001 | .003 | -.329 | .744 | -.019 |
| STAI Trait | -.004 | .004 | -.875 | .386 | -.005 |
| PSS: NICU A | -.007 | .019 | -.362 | .720 | -.035 |
| PSS: NICU B | -.008 | .006 | -1.309 | .202 | .027 |

**Abbreviations:** FP, Functional Parenting; PC, Physical Contact; PSS, Perceived Stress Scale; PSS: NICU A, Perceived Stress Scale: Neonatal Intensive Care Unit Sub-scale A (Medical vulnerability), PSS: NICU B, Perceived Stress Scale: Neonatal Intensive Care Unit sub-scale B (Perceived lack of control); STAI-Trait, State-Trait Anxiety Inventory–Trait; STAI-S, State-Trait Anxiety Inventory–State; GA, Gestational Age; *p*, p-value. Std E., Standard Error; T-value, t statistic; *p*, probability value; Adj. R², adjusted coefficient of determination.

**Supplement Table 4**. Adjusted Models

| **su** | **Factors** | **Estimate** | **Std E.** | **T-value** | ***p*** | **Adj. R2** | **Model *p*** | **BIC** | **β** |
| --- | --- | --- | --- | --- | --- | --- | --- | --- | --- |
| **FP 1** | PSS | -.005 | .006 | -.884 | .386 | .36 | .005* | 5.96 | -.15 |
| GA at Birth | .021 | .011 | 1.89 | .073^ |  | | | .31 |
| Maternal Education | .128 | .036 | 3.51 | .002* | .61 |
| **FP 2** | STAI State | -.003 | .003 | -.741 | .467 | .35 | .008* | 7.09 | -.13 |
| GA at Birth | .022 | .012 | 1.83 | .082^ |  | | | .33 |
| Maternal Education | .143 | .038 | 3.79 | .001** | .66 |
| **FP 3** | STAI Trait | -.004 | .005 | -.864 | .398 | .36 | .008* | 6.86 | -.16 |
| GA at Birth | .022 | .012 | 1.86 | .077^ |  | | | .33 |
| Maternal Education | .134 | .039 | 3.45 | .003* | .62 |
| **FP 4** | PSS: NICU B | -.015 | .003 | -4.62 | < .001*** | .66 | < .001*** | **-10.78** | -.55 |
| GA at Birth | .027 | .008 | 3.21 | .004 * |  | | | .39 |
| Maternal Education | .165 | .026 | 6.37 | < .001*** | .79 |
| **FP 5** | PSS: NICU A | -.025 | .013 | -1.85 | .078^ | .43 | 0.002* | 3.12 | -.29 |
| GA at Birth | .023 | .011 | 2.14 | .044^ |  | | | .34 |
| Maternal Education | .156 | .034 | 4.54 | < .001*** | .75 |
| **PC 1** | PSS | -.002 | .006 | -.348 | .731 | .49 | < .001*** | 3.97 | -.05 |
| GA at Birth | .028 | .011 | 2.58 | .017* |  | | | .38 |
| Maternal Education | .1668 | .035 | 4.75 | < .001*** | .74 |
| **PC 2** | STAI State | -.003 | .003 | -.855 | .403 | .49 | < .001*** | 5.03 | -.13 |
| GA at Birth | .029 | .011 | 2.57 | .018* |  | | | .41 |
| Maternal Education | .169 | .036 | 4.76 | < .001*** | .74 |
| **PC 3** | STAI Trait | -.015 | .005 | -.525 | .605 | .476 | .001* | 5.03 | -.085 |
| GA at Birth | .033 | .011 | 2.470 | .023* |  | | | .395 |
| Maternal Education | .197 | .037 | 4.405 | < .001*** | .713 |
| **PC 4** | PSS:NICU B | -.015 | .003 | -4.96 | < .001*** | .76 | < .001*** | **-15.38** | -.50 |
| GA at Birth | .033 | .008 | 4.39 | < .001*** |  | | | .45 |
| Maternal Education | .197 | .024 | 8.31 | < .001*** | .87 |
| **PC 5** | PSS:NICU A | -.029 | .012 | -2.36 | .026* | .59 | < .001*** | -1.75 | -.31 |
| GA at Birth | .030 | .010 | 3.08 | < .001*** |  | | | .41 |
| Maternal Education | .192 | .031 | 6.12 | < .001*** | .85 |

**Notes:** Lower BIC values indicate better model fit. The best-fitting model for each outcome is highlighted in bold. ΔBIC values represent the difference between the best-fitting model and the next best model. ΔBIC > 10 indicates very strong evidence favoring the best-fitting model (Raftery, 1995). Significance levels: ^p < .10; *p < .05; **p < .01; ***p < .001.

**Abbreviations:** FP, Functional Parenting; PC, Physical Contact; PSS, Perceived Stress Scale; PSS: NICU A, Perceived Stress Scale: Neonatal Intensive Care Unit Sub-scale A (Medical vulnerability), PSS: NICU B, Perceived Stress Scale: Neonatal Intensive Care Unit sub-scale B (Perceived lack of control); STAI Trait, State-Trait Anxiety Inventory–Trait; STAI State, State-Trait Anxiety Inventory–State; GA, Gestational Age; *p*, p-value. Std E., Standard Error; T-value, t statistic; *p*, probability value; Adj. R², adjusted coefficient of determination; Model p, overall model significance; BIC, Bayesian Information Criterion; β, standardized regression coefficient.

**SUPPLEMENT B**

**PSS: NICU**

A more accurate way to measure personal stress in the Neonatal Intensive Care Unit (NICU) is by using various tools designed to assess individual stress levels. The first is called the Perceived Stress Scale in the Neonatal Intensive Care Unit (PSS: NICU). The PSS: NICU is a well-established stress assessment tool in the NICU. It is widely used to help us understand how different situations influence our feelings and perceived stress.

The questions on this scale ask about your feelings and thoughts during the past month. For each one, you will be asked to indicate how often you felt or thought a certain way. While some questions may seem similar, there are differences between them, and you should treat each as a separate question. The best way is to answer quickly. Do not try to count the exact number of times you felt a certain way; instead, choose the option that seems like a reasonable estimate.

For each question, choose from the following alternatives:

0 - never 1 - almost never 2 - sometimes 3 - fairly often 4 - very often

_____ 1. In the last month, how often have I been upset with the constant noises of monitors and equipment?

_____ 2. In the last month, how often have I felt nervous and stressed with the large number of people working in the unit?

_____ 3. In the last month, how often have I felt nervous and stressed with the small size of my baby?

_____ 4. In the last month, how often have I felt nervous and stressed when my baby seemed to be in pain?

_____ 5. In the last month, how often have I felt nervous and stressed about being separated from my baby?

_____ 6. In the last month, how often have I felt nervous and stressed about not feeding my baby by myself?

_____ 7. In the last month, how often have I felt nervous and stressed with not being able to hold my baby when I want?

_____ 8. In the last month, how often have I felt helpless and unable to protect my baby from pain and painful procedures?

_____ 9. In the last month, how often have I felt nervous and stressed with my experience of having my baby in the NICU?

**PSS: NICU B**

Parents perceived lack of control – Items 4, 5, 6, 7, 8, and 9.

**PSS: NICU A**

Infant’s perceived medical vulnerability – Item 1, 2, and 3.
